# Supplementary material for: Pharmacokinetics, Pharmacodynamics, and Safety of Nivolumab in Patients With Sepsis-Induced Immunosuppression: A Multicenter, Open-Label Phase 1/2 Study
Source: PubMed Central journal article supplement — Shock. 2019 Jun 9;53(6):686–94. doi: 10.1097/SHK.0000000000001443 (PMC7448837; doi:10.1097/shk.0000000000001443), 2019-06-09
Supplement: shk-53-686-s001.pdf [file shk-53-686-s001.pdf]

**Supplemental Digital Content 1.** Patient laboratory data at baseline and end of study (hematology, chemistry, urinalysis, other)

|                                     |                       | Observed Value            |                           | Change from baseline      |                           |
|-------------------------------------|-----------------------|---------------------------|---------------------------|---------------------------|---------------------------|
|                                     |                       | Nivolumab<br>480 mg (N=5) | Nivolumab<br>960 mg (N=9) | Nivolumab<br>480 mg (N=5) | Nivolumab<br>960 mg (N=9) |
| <b>Hematology</b>                   |                       |                           |                           |                           |                           |
| Hemoglobin (g/L)                    | Baseline <sup>a</sup> | 110.8 (11.9)              | 96.4 (14.9)               |                           |                           |
|                                     | EOS <sup>b</sup>      | 105.8 (15.2)              | 95.2 (13.6)               | -8.8 (5.7)                | -4.6 (26.4)               |
| Hematocrit (%)                      | Baseline <sup>a</sup> | 34.8 (3.6)                | 28.8 (5.0)                |                           |                           |
|                                     | EOS <sup>b</sup>      | 32.8 (4.3)                | 29.8 (4.3)                | -3.4 (2.6)                | -0.5 (8.0)                |
| Leukocytes (10 <sup>9</sup> /L)     | Baseline <sup>a</sup> | 18.2 (11.8)               | 11.1 (2.7)                |                           |                           |
|                                     | EOS <sup>b</sup>      | 8.3 (5.3)                 | 8.2 (2.7)                 | -11.8 (7.8)               | -2.5 (5.0)                |
| Neutrophils/leukocytes (%)          | Baseline <sup>a</sup> | 88.2 (4.6)                | 87.9 (5.6)                |                           |                           |
|                                     | EOS <sup>b</sup>      | 64.6 (12.1)               | 73.0 (9.6)                | -22.6 (7.5)               | -14.5 (7.4)               |
| Lymphocytes/leukocytes (%)          | Baseline <sup>a</sup> | 7.4 (2.9)                 | 5.8 (2.3)                 |                           |                           |
|                                     | EOS <sup>b</sup>      | 24.2 (9.5)                | 17.0 (7.9)                | 16.2 (7.0)                | 10.3 (6.4)                |
| Eosinophils/leukocytes (%)          | Baseline <sup>a</sup> | 0.7 (1.2)                 | 0.6 (1.1)                 |                           |                           |
|                                     | EOS <sup>b</sup>      | 2.1 (1.5)                 | 3.9 (2.4)                 | 1.2 (1.65)                | 3.5 (2.7)                 |
| Basophils/leukocytes (%)            | Baseline <sup>a</sup> | 0.2 (0.3)                 | 0.1 (0.1)                 |                           |                           |
|                                     | EOS <sup>b</sup>      | 0.8 (0.2)                 | 0.4 (0.5)                 | 0.5 (0.4)                 | 0.4 (0.5)                 |
| Monocytes/leukocytes (%)            | Baseline <sup>a</sup> | 2.7 (1.2)                 | 4.5 (3.5)                 |                           |                           |
|                                     | EOS <sup>b</sup>      | 5.3 (1.7)                 | 5.5 (3.4)                 | 2.6 (1.5)                 | 0.6 (1.1)                 |
| Neutrophils (10 <sup>9</sup> /L)    | Baseline <sup>a</sup> | 16.3 (11.3)               | 9.7 (2.6)                 |                           |                           |
|                                     | EOS <sup>b</sup>      | 5.7 (4.7)                 | 6.2 (2.6)                 | -12.3 (7.7)               | -3.2 (4.3)                |
| Lymphocytes (10 <sup>9</sup> /L)    | Baseline <sup>a</sup> | 1.28 (0.4)                | 0.6 (0.3)                 |                           |                           |
|                                     | EOS <sup>b</sup>      | 1.8 (0.8)                 | 1.3 (0.6)                 | 0.4 (0.8)                 | 0.6 (0.6)                 |
| Eosinophils (10 <sup>9</sup> /L)    | Baseline <sup>a</sup> | 0.1 (0.2)                 | 0.1 (0.1)                 |                           |                           |
|                                     | EOS <sup>b</sup>      | 0.1 (0.1)                 | 0.3 (0.1)                 | 0.0 (0.2)                 | 0.2 (0.1)                 |
| Basophils (10 <sup>9</sup> /L)      | Baseline <sup>a</sup> | 0.0 (0.1)                 | 0.0 (0.0)                 |                           |                           |
|                                     | EOS <sup>b</sup>      | 0.1 (0.1)                 | 0.0 (0.0)                 | 0.0 (0.1)                 | 0.0 (0.0)                 |
| Monocytes (10 <sup>9</sup> /L)      | Baseline <sup>a</sup> | 0.5 (0.3)                 | 0.5 (0.4)                 |                           |                           |
|                                     | EOS <sup>b</sup>      | 0.4 (0.3)                 | 0.4 (0.3)                 | -0.1 (0.1)                | -0.1 (0.4)                |
| Platelets (10 <sup>9</sup> /L)      | Baseline <sup>a</sup> | 147.6 (93.5)              | 91.9 (45.4)               |                           |                           |
|                                     | EOS <sup>b</sup>      | 341.8 (143.0)             | 229.2 (148.9)             | 186.0 (177.0)             | 137.0 (170.4)             |
| CD4/lymphocytes (%)                 | Baseline <sup>a</sup> | 41.8 (10.5)               | 50.7 (8.9)                |                           |                           |
|                                     | EOS <sup>b</sup>      | 60.3 (12.6)               | 52.8 (10.5)               | 14.3 (14.6)               | 0.5 (12.2)                |
| CD8/lymphocytes (%)                 | Baseline <sup>a</sup> | 14.6 (4.3)                | 12.0 (6.7)                |                           |                           |
|                                     | EOS <sup>b</sup>      | 24.0 (12.2)               | 21.1 (10.0)               | 10.5 (8.3)                | 5.9 (8.5)                 |
| CD4 (10 <sup>9</sup> /L)            | Baseline <sup>a</sup> | 0.51 (0.23)               | 0.36 (0.17)               |                           |                           |
|                                     | EOS <sup>b</sup>      | 1.1 (0.7)                 | 0.8 (0.4)                 | 0.5 (0.7)                 | 0.3 (0.5)                 |
| CD8 (10 <sup>9</sup> /L)            | Baseline <sup>a</sup> | 0.2 (0.1)                 | 0.1 (0.1)                 |                           |                           |
|                                     | EOS <sup>b</sup>      | 0.6 (0.4)                 | 0.3 (0.2)                 | 0.3 (0.4)                 | 0.2 (0.1)                 |
| CD4/CD8                             | Baseline <sup>a</sup> | 3.2 (1.5)                 | 6.1 (4.1)                 |                           |                           |
|                                     | EOS <sup>b</sup>      | 2.9 (1.1)                 | 3.1 (1.6)                 | -0.8 (1.0)                | -0.9 (1.4)                |
| <b>Chemistry</b>                    |                       |                           |                           |                           |                           |
| Albumin (g/L)                       | Baseline <sup>a</sup> | 25.0 (4.5)                | 22.6 (4.4)                |                           |                           |
|                                     | EOS <sup>b</sup>      | 24.5 (7.9)                | 25.0 (5.1)                | 0.8 (10.2)                | 3.2 (8.8)                 |
| Alkaline phosphatase (μkat/L)       | Baseline <sup>a</sup> | 7.0 (3.0)                 | 4.5 (2.4)                 |                           |                           |
|                                     | EOS <sup>b</sup>      | 19.4 (28.8)               | 5.5 (2.0)                 | 11.9 (25.8)               | 0.84 (2.2)                |
| Aspartate aminotransferase (μkat/L) | Baseline <sup>a</sup> | 1.4 (0.7)                 | 3.5 (4.8)                 |                           |                           |
|                                     | EOS <sup>b</sup>      | 0.9 (0.9)                 | 0.6 (0.4)                 | -0.6 (1.01)               | -0.4 (0.6)                |
| Alanine aminotransferase (nkat/L)   | Baseline <sup>a</sup> | 1716.7 (1338.0)           | 1660.5 (2388.6)           |                           |                           |
|                                     | EOS <sup>b</sup>      | 1445.9 (2299.6)           | 523.3 (401.8)             | -475.0 (1859.5)           | -50.0 (581.8)             |
| Bilirubin (μM/L)                    | Baseline <sup>a</sup> | 12.4 (3.6)                | 33.5 (32.0)               |                           |                           |
|                                     | EOS <sup>b</sup>      | 44.3 (68.7)               | 9.7 (8.1)                 | 31.1 (37.1)               | -5.1 (5.2)                |

|                                 |                       |               |               |                |               |
|---------------------------------|-----------------------|---------------|---------------|----------------|---------------|
| Direct bilirubin (µM/L)         | Baseline <sup>a</sup> | 6.4 (3.4)     | 24.6 (24.8)   |                |               |
|                                 | EOS <sup>b</sup>      | 43.2 (69.2)   | 5.0 (5.9)     | 56.4 (80.0)    | -3.1 (4.0)    |
| Protein (g/L)                   | Baseline <sup>a</sup> | 51.2 (6.6)    | 49.9 (6.7)    |                |               |
|                                 | EOS <sup>b</sup>      | 57.5 (5.5)    | 61.6 (5.7)    | 8.0 (6.7)      | 12.2 (10.7)   |
| Creatinine (µM/L)               | Baseline <sup>a</sup> | 142.2 (100.1) | 245.8 (233.2) |                |               |
|                                 | EOS <sup>b</sup>      | 176.8 (233.1) | 154.2 (116.5) | 65.9 (152.2)   | -59.6 (141.7) |
| Lipase (µkat/L)                 | Baseline <sup>a</sup> | 0.7 (0.7)     | 1.7 (3.1)     |                |               |
|                                 | EOS <sup>b</sup>      | 0.8 (0.7)     | 2.4 (4.3)     | 0.1 (1.2)      | 1.7 (4.7)     |
| Amylase (µkat/L)                | Baseline <sup>a</sup> | 2.3 (3.2)     | 2.1 (1.7)     |                |               |
|                                 | EOS <sup>b</sup>      | 1.5 (0.9)     | 2.5 (3.3)     | 0.7 (0.7)      | 0.8 (4.1)     |
| Glucose (mM/L)                  | Baseline <sup>a</sup> | 10.7 (3.1)    | 7.3 (1.1)     |                |               |
|                                 | EOS <sup>b</sup>      | 7.1 (3.1)     | 6.7 (2.1)     | -4.3 (3.6)     | -0.28 (2.3)   |
| Lactate dehydrogenase (ukat/L)  | Baseline <sup>a</sup> | 7.1 (3.6)     | 10.3 (8.5)    |                |               |
|                                 | EOS <sup>b</sup>      | 3.3 (0.7)     | 4.8 (2.6)     | -4.2 (3.5)     | -1.2 (2.0)    |
| Urea nitrogen (mM/L)            | Baseline <sup>a</sup> | 15.1 (5.4)    | 15.2 (13.0)   |                |               |
|                                 | EOS <sup>b</sup>      | 7.1 (4.9)     | 10.4 (6.1)    | -7.0 (7.3)     | -1.5 (3.9)    |
| Phosphate (mM/L)                | Baseline <sup>a</sup> | 0.8 (0.3)     | 1.3 (0.5)     |                |               |
|                                 | EOS <sup>b</sup>      | 1.2 (0.2)     | 1.0 (0.1)     | 0.4 (0.3)      | -0.1 (0.4)    |
| Calcium (mM/L)                  | Baseline <sup>a</sup> | 2.07 (0.1)    | 1.91 (0.2)    |                |               |
|                                 | EOS <sup>b</sup>      | 2.2 (0.1)     | 2.2 (0.1)     | 0.1 (0.2)      | 0.2 (0.2)     |
| Sodium (mM/L)                   | Baseline <sup>a</sup> | 144.0 (11.2)  | 138.5 (5.4)   |                |               |
|                                 | EOS <sup>b</sup>      | 134.8 (7.6)   | 141.2 (4.5)   | -10.0 (12.2)   | 2.6 (5.4)     |
| Potassium (mM/L)                | Baseline <sup>a</sup> | 4.5 (0.6)     | 3.9 (0.7)     |                |               |
|                                 | EOS <sup>b</sup>      | 3.9 (0.4)     | 3.8 (0.8)     | -0.5 (0.4)     | -0.0 (0.6)    |
| Chloride (mM/L)                 | Baseline <sup>a</sup> | 108.6 (4.4)   | 103.4 (5.8)   |                |               |
|                                 | EOS <sup>b</sup>      | 98.8 (4.6)    | 105.0 (4.5)   | -10.0 (6.4)    | 1.2 (5.8)     |
| C Reactive Protein (mg/L)       | Baseline <sup>a</sup> | 94.1 (74.2)   | 203.4 (77.2)  |                |               |
|                                 | EOS <sup>b</sup>      | 21.1 (23.2)   | 41.5 (54.7)   | -64.9 (69.0)   | -142.8 (86.1) |
| Magnesium (mM/L)                | Baseline <sup>a</sup> | 0.9 (0.1)     | 0.8 (0.2)     |                |               |
|                                 | EOS <sup>b</sup>      | 0.7 (0.1)     | 0.8 (0.1)     | -0.2 (0.2)     | -0.0 (0.1)    |
| Bicarbonate (mM/L)              | Baseline <sup>a</sup> | 24.4 (9.1)    | 22.2 (6.6)    |                |               |
|                                 | EOS <sup>b</sup>      | 24.7 (4.9)    | 26.6 (3.8)    | -0.8 (8.3)     | 2.7 (2.4)     |
| <b>Urinalysis</b>               |                       |               |               |                |               |
| Specific gravity                | Baseline <sup>a</sup> | 1.022 (0.008) | 1.017 (0.008) |                |               |
|                                 | EOS <sup>b</sup>      | 1.010 (0.006) | 1.020 (0.006) | -0.015 (0.005) | 0.002 (0.012) |
| pH                              | Baseline <sup>a</sup> | 6.8 (1.6)     | 5.9 (0.9)     |                |               |
|                                 | EOS <sup>b</sup>      | 6.7 (0.6)     | 6.0 (1.2)     | 0.2 (1.8)      | -0.2 (1.1)    |
| <b>Other</b>                    |                       |               |               |                |               |
| Thyrotropin (mIU/L)             | Baseline <sup>c</sup> | 2.46 (1.09)   | 2.35 (2.61)   |                |               |
|                                 | EOS <sup>d</sup>      | 2.80 (0.68)   | 3.31 (5.85)   | 0.69 (0.65)    | 0.63 (3.30)   |
| Triiodothyronine, Free (pmol/L) | Baseline <sup>e</sup> | 1.69 (0.27)   | 1.85 (0.28)   |                |               |
|                                 | EOS <sup>b</sup>      | 2.85 (1.33)   | 3.42 (1.31)   | 0.79 (1.10)    | 1.54 (1.15)   |
| Thyroxine, Free (pmol/L)        | Baseline <sup>e</sup> | 7.51 (1.24)   | 12.77 (3.24)  |                |               |
|                                 | EOS <sup>b</sup>      | 12.55 (3.23)  | 15.83 (5.48)  | 4.59 (2.58)    | 3.96 (4.58)   |

Values are given as mean (SD). Significance in the differences between the groups is not determined as no statistical testing was conducted.

<sup>a</sup>480 mg, n=5; 960 mg, n=9

<sup>b</sup>480 mg, n=4; 960 mg, n=5

<sup>c</sup>480 mg, n=4; 960 mg, n=8 (patients who were measured using a different unit were excluded from the summary)

<sup>d</sup>480 mg, n=3; 960 mg, n=5 (patients who were measured using a different unit were excluded from the summary)

<sup>e</sup>480 mg, n=3; 960 mg, n=8

EOS, end of study (Day 28); SD, standard deviation
