# Supplementary material for: Pharmacokinetics, Pharmacodynamics, and Safety of Nivolumab in Patients With Sepsis-Induced Immunosuppression: A Multicenter, Open-Label Phase 1/2 Study
Source: PubMed Central journal article supplement — Shock. 2019 Jun 9;53(6):686–94. doi: 10.1097/SHK.0000000000001443 (PMC7448837; doi:10.1097/shk.0000000000001443), 2019-06-09

**Supplemental Digital Content 2.** Time course of nivolumab serum concentration in each patient in the (A) 480 mg nivolumab group and (B) 960 mg nivolumab group

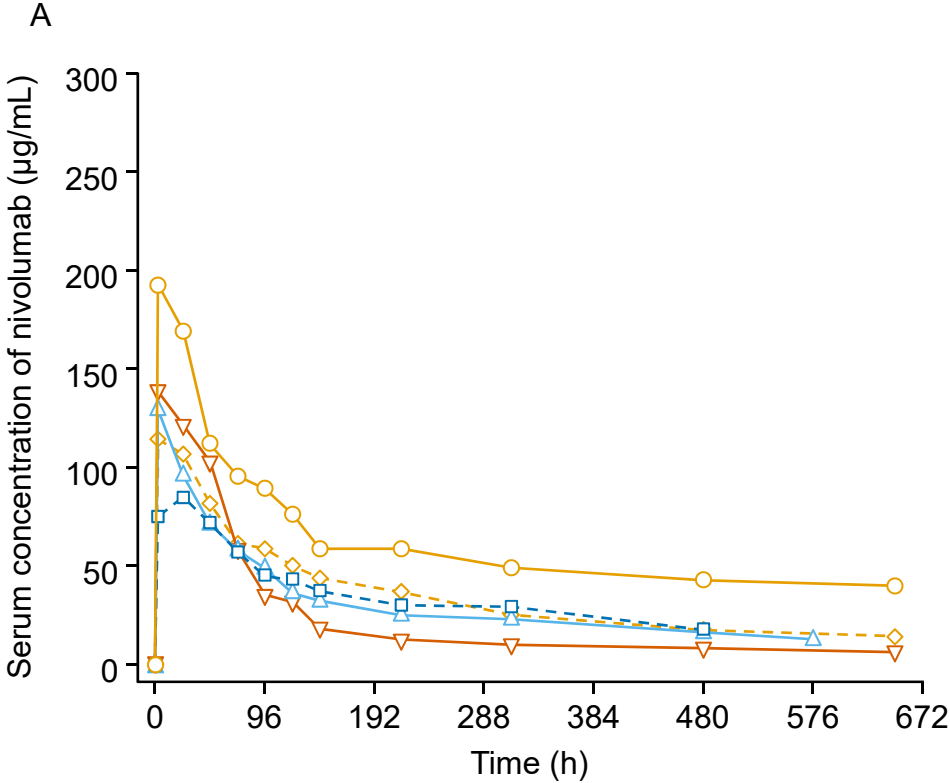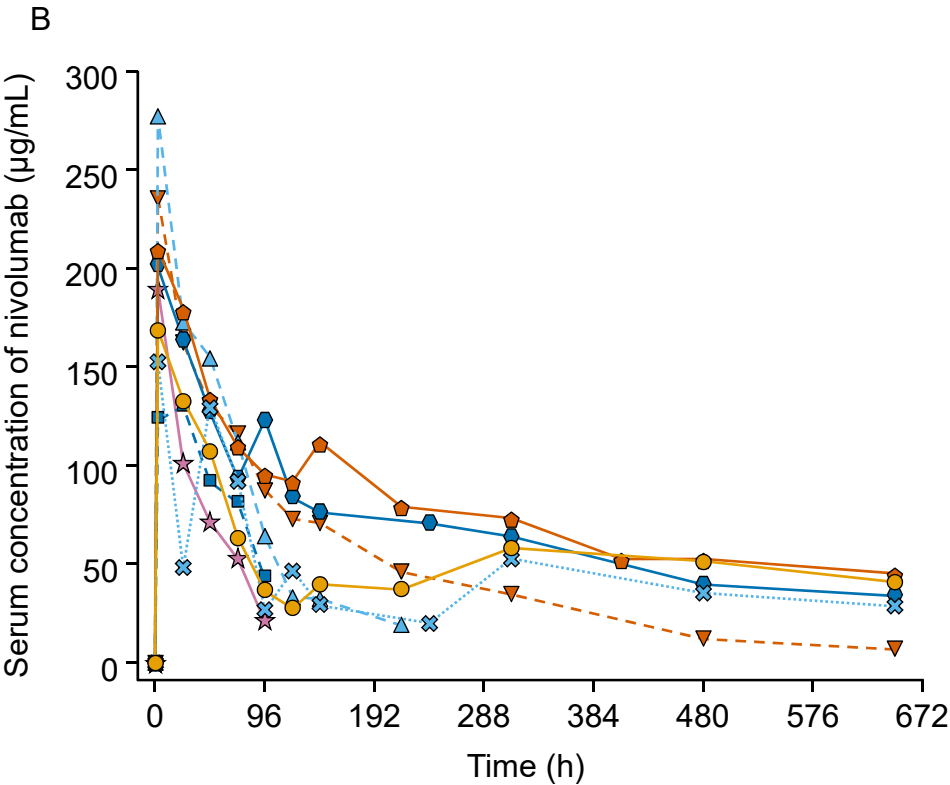

Supplement: shk-53-686-s002.pdf [file shk-53-686-s002.pdf]
