# Supplementary material for: Pharmacokinetics, Pharmacodynamics, and Safety of Nivolumab in Patients With Sepsis-Induced Immunosuppression: A Multicenter, Open-Label Phase 1/2 Study
Source: PubMed Central journal article supplement — Shock. 2019 Jun 9;53(6):686–94. doi: 10.1097/SHK.0000000000001443 (PMC7448837; doi:10.1097/shk.0000000000001443), 2019-06-09

**Supplemental Digital Content 3.** Time course of lymphocyte counts for each patient in the (A) 480 mg nivolumab group and (B) 960 mg nivolumab group  
 BL, baseline.  
 The lymphocyte count reference line is at 1100/ $\mu$ L.

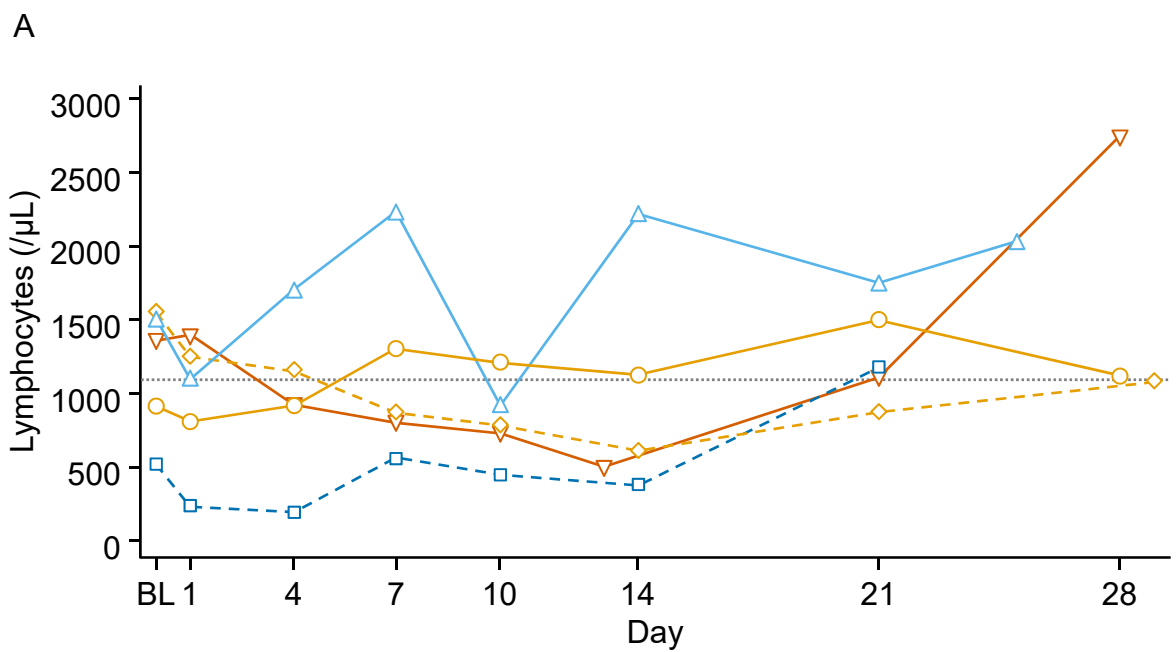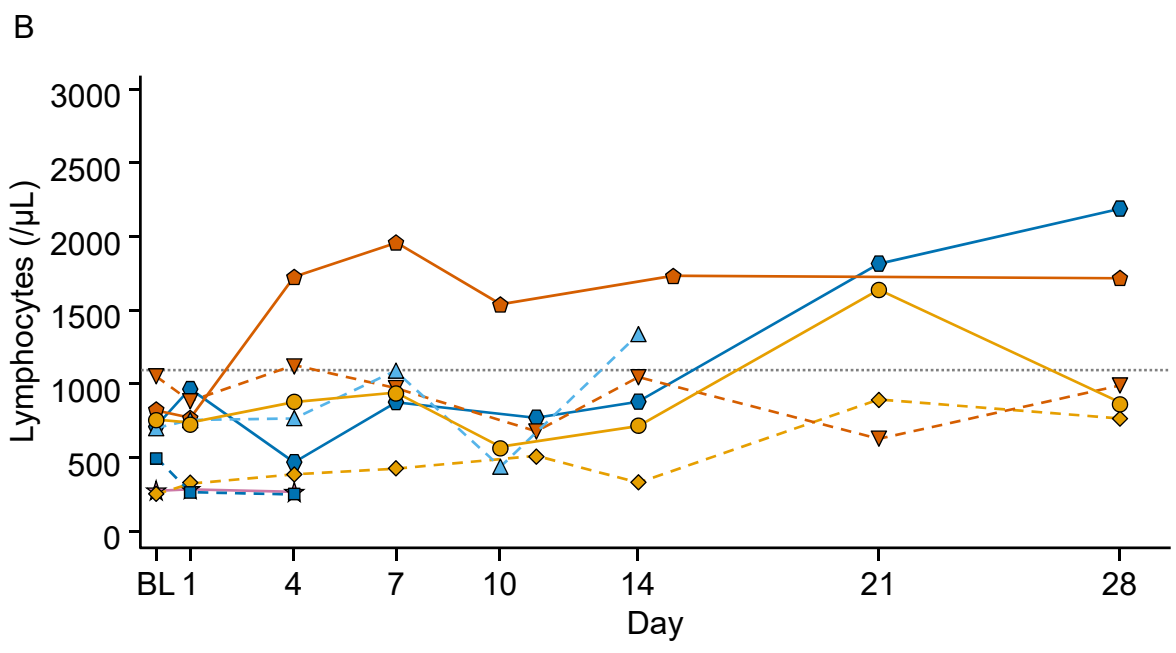

Supplement: shk-53-686-s003.pdf [file shk-53-686-s003.pdf]
