# Supplementary material for: Pharmacokinetics, Pharmacodynamics, and Safety of Nivolumab in Patients With Sepsis-Induced Immunosuppression: A Multicenter, Open-Label Phase 1/2 Study
Source: PubMed Central journal article supplement — Shock. 2019 Jun 9;53(6):686–94. doi: 10.1097/SHK.0000000000001443 (PMC7448837; doi:10.1097/shk.0000000000001443), 2019-06-09

**Supplemental Digital Content 4.** Time course of mHLA-DR antigen expression for each patient in the (A) 480 mg nivolumab group and (B) 960 mg nivolumab group

BL, baseline; mHLA-DR, monocyte HLA-DR.  
The mHLA-DR reference line is at 8000 mAb/cell.

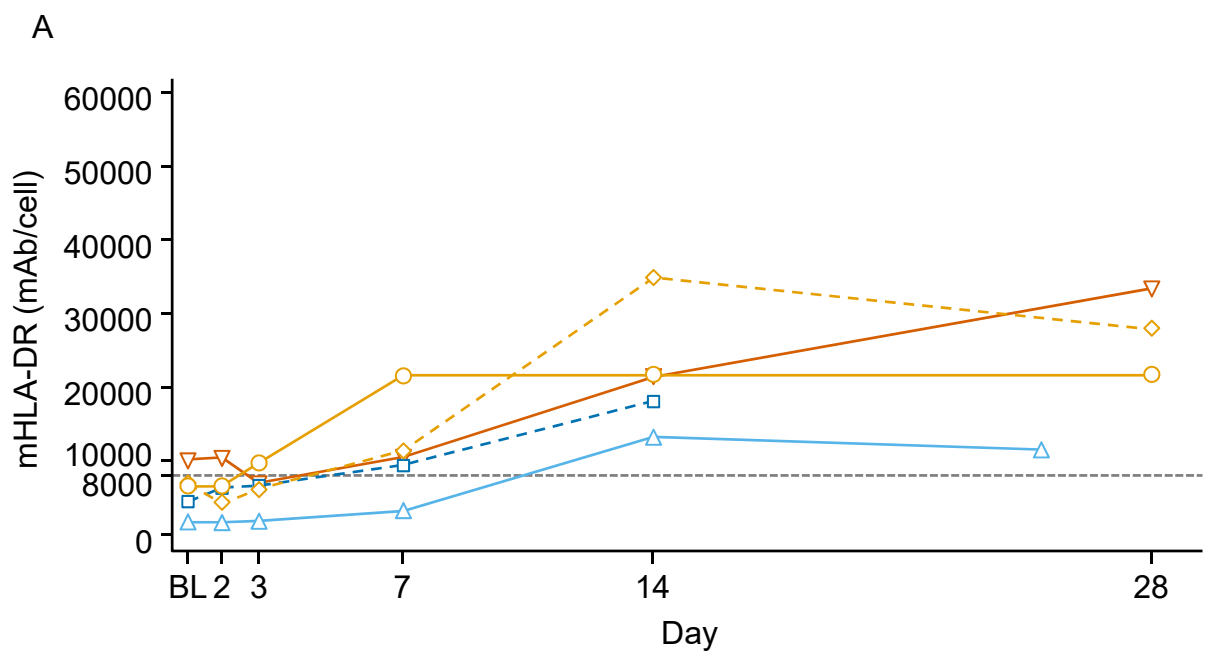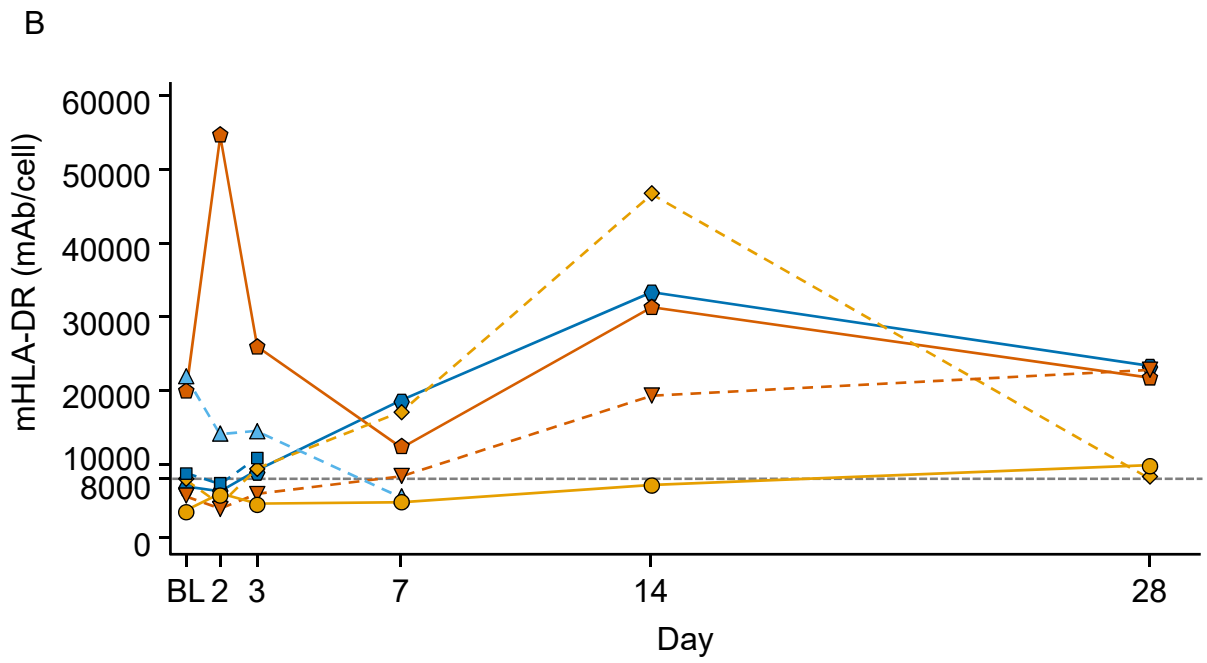

Supplement: shk-53-686-s004.pdf [file shk-53-686-s004.pdf]
