# Supplementary material for: Pharmacokinetics, Pharmacodynamics, and Safety of Nivolumab in Patients With Sepsis-Induced Immunosuppression: A Multicenter, Open-Label Phase 1/2 Study
Source: PubMed Central journal article supplement — Shock. 2019 Jun 9;53(6):686–94. doi: 10.1097/SHK.0000000000001443 (PMC7448837; doi:10.1097/shk.0000000000001443), 2019-06-09
Supplement: shk-53-686-s005.pdf [file shk-53-686-s005.pdf]

**Supplemental Digital Content 5.** Description of patients who died during the study

|           | <b>Nivolumab dose</b> | <b>Duration of sepsis (at administration)</b> | <b>Primary site of infection</b> | <b>Cause of death</b>                                              | <b>Co-morbidities</b>                                                                                                                                                                                                                                                                                                                               |
|-----------|-----------------------|-----------------------------------------------|----------------------------------|--------------------------------------------------------------------|-----------------------------------------------------------------------------------------------------------------------------------------------------------------------------------------------------------------------------------------------------------------------------------------------------------------------------------------------------|
| Patient 1 | 480 mg                | 1 day                                         | Lung                             | Multi-organ failure                                                | <ul style="list-style-type: none"> <li>• Acute renal failure</li> <li>• Atrial fibrillation</li> <li>• Prostatic hyperplasia</li> <li>• Heart failure</li> <li>• Cerebral infarction</li> <li>• Chronic kidney disease</li> <li>• Diabetes mellitus</li> <li>• Hypertension</li> <li>• Pneumonia</li> <li>• Itching</li> </ul>                      |
| Patient 2 | 960 mg                | 3 days                                        | Lung                             | Pneumonia<br>(Not an AE)                                           | <ul style="list-style-type: none"> <li>• Asthma</li> <li>• Chronic kidney disease</li> <li>• Chronic obstructive</li> <li>• Pulmonary disease</li> <li>• Diabetes</li> <li>• Hyperlipidemia</li> <li>• Hypertension</li> <li>• Hyperuricemia</li> <li>• Insomnia</li> </ul>                                                                         |
| Patient 3 | 960 mg                | 1 day                                         | Skin/<br>SoftTissue              | Exacerbation of<br>primary disease<br>(Not an AE)                  | <ul style="list-style-type: none"> <li>• Cerebral infarction</li> <li>• Hyperlipidemia</li> <li>• Hypertension</li> <li>• Oral floor carcinoma</li> <li>• Pulmonary metastasis</li> </ul>                                                                                                                                                           |
| Patient 4 | 960 mg                | 2 days                                        | Lung                             | Pneumonia<br>(Not an AE)<br><br>Multi-organ failure<br>(Not an AE) | <ul style="list-style-type: none"> <li>• Atrial fibrillation</li> <li>• Albumin decreased</li> <li>• Creatine kinase increased</li> <li>• Coarse crackles</li> <li>• Dry skin</li> <li>• Hemoglobin decreased</li> <li>• Bleeding tendency</li> <li>• Intraoral ulcer</li> <li>• Pancreatic enzyme increased</li> <li>• Severe pneumonia</li> </ul> |

AE, adverse event
