# Supplementary material for: Pharmacokinetics, Pharmacodynamics, and Safety of Nivolumab in Patients With Sepsis-Induced Immunosuppression: A Multicenter, Open-Label Phase 1/2 Study
Source: PubMed Central journal article supplement — Shock. 2019 Jun 9;53(6):686–94. doi: 10.1097/SHK.0000000000001443 (PMC7448837; doi:10.1097/shk.0000000000001443), 2019-06-09
Supplement: shk-53-686-s006.pdf [file shk-53-686-s006.pdf]

**Supplemental Digital Content 6.** Laboratory findings for patient with hypothyroidism (drug-related AE)

| Day | TSH <sup>a</sup> (μU/mL) | T3FR <sup>b</sup> (pmol/L) | T4FR <sup>c</sup> (pmol/L) |
|-----|--------------------------|----------------------------|----------------------------|
| 2   | 5.89                     | 2.00                       | 8.62                       |
| 26  | 4.16                     | 4.04                       | 15.83                      |
| 47  | 6.88 <sup>d</sup>        | 5.50                       | 12.74                      |
| 60  | 7.47 <sup>d</sup>        | 4.59                       | 10.43                      |
| 74  | 6.36 <sup>d</sup>        | 5.59                       | 10.94                      |
| 88  | 5.02 <sup>d</sup>        | 5.53                       | 9.91                       |
| 144 | 6.70 <sup>d</sup>        | 5.21                       | 13.26                      |
| 200 | 4.16 <sup>e</sup>        | 5.04                       | 13.26                      |

<sup>a</sup>Reference range (institutional): 0.5–5 μU/mL

<sup>b</sup>Reference range (institutional): 3.53–6.14 pmol/L

<sup>c</sup>Reference range (institutional): 11.58–21.88 pmol/L

<sup>d</sup>Determined to be hypothyroidism

<sup>e</sup>Determined to be normal (resolved)

AE, adverse event; TSH, thyroid stimulating hormone; T3FR, free triiodothyronine; T4FR, free thyroxine
